# Supplementary material
Source: PubMed Central journal article supplement (PMC4565172)
Supplement: supp_3.2.E251_2014-0095-appendix_1.pdf [file supp_3.2.E251_2014-0095-appendix_1.pdf]

**Appendix 1 (as supplied by authors):** Questionnaire used to study cannabinoid prescription for the management of chronic noncancer pain among physicians in the Abitibi-Témiscamingue region of Quebec

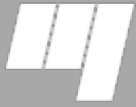

Université du Québec  
en Abitibi-Témiscamingue

**La prescription de  
cannabinoïdes pour la  
prise en charge de la  
douleur chronique non  
cancéreuse en Abitibi-  
Témiscamingue**

## **Questionnaire adressé aux médecins**

---

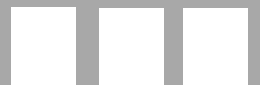

## Préambule

La douleur chronique, qui a des répercussions importantes sur le fonctionnement physique et psychologique des personnes qui en souffrent, touche environ un adulte sur cinq au Québec. Les syndromes de douleur chronique non cancéreuse comprennent notamment la lombalgie, la cervicalgie, l'arthrite rhumatoïde, l'arthrose, les migraines, les céphalées, la fibromyalgie, le syndrome du côlon irritable, les névralgies ainsi que les douleurs chroniques post-traumatiques ou postchirurgicales.

Parmi les modalités thérapeutiques permettant une prise en charge de la douleur chronique, les cannabinoïdes naturels et synthétiques se sont avérés efficaces et sécuritaires pour certains de ces syndromes. Ces produits pharmacologiques comprennent le nabilone (Césamet<sup>®</sup>), le dronabinol (Marinol<sup>®</sup>), le THC/cannabidiol (Sativex<sup>®</sup>) et la marijuana à des fins médicales. Ceux-ci sont tous disponibles avec ordonnance au Canada.

Les questions suivantes portent sur les tendances de prescription, le degré de confort, les besoins en matière de formation et les barrières face à la prescription de cannabinoïdes. Nous vous invitons à inscrire vos réponses au meilleur de votre connaissance.

# Tendances de prescription de cannabinoïdes

## 1. Au cours de la dernière année, avez-vous prescrit des cannabinoïdes?

<sub>0</sub> Non    <sub>1</sub> Oui

### Si oui, lesquels? *(Cochez plusieurs cases, s'il y a lieu)*

- Nabilone (Césamet<sup>®</sup>)
- Dronabinol (Marinol<sup>®</sup>)
- THC/cannabidiol (Sativex<sup>®</sup>)
- Marihuana à des fins médicale (Programme d'accès de Santé Canada)

### Si oui, pour quel(s) problème(s) de santé?

*(Cochez plusieurs cases, s'il y a lieu)*

- Douleur chronique non cancéreuse
- Douleur chronique cancéreuse
- Douleur aiguë
- Anorexie avec perte de poids
- Anxiété
- Nausées et vomissements
- Sommeil
- Spasticité
- Autres (veuillez préciser) : \_\_\_\_\_

### Si oui, à combien de patients (dans la dernière année)?

<sub>0</sub> 1-5    <sub>1</sub> 6-10    <sub>2</sub> 11-20    <sub>3</sub> 21-50    <sub>4</sub> >50

### Si non, pourquoi?

---

---

---

## Degré de confort envers la prescription de cannabinoïdes

**2. Actuellement, quel est votre degré de confort à prescrire des cannabinoïdes (toutes indications confondues)?** *(Veuillez encercler la réponse)*

0 1 2 3 4 5 6 7 8 9 10

Inconfortable

Confortable

**3. Actuellement, quel est votre degré de confort à prescrire des cannabinoïdes pour la prise en charge de la douleur chronique non cancéreuse?** *(Veuillez encercler la réponse)*

0 1 2 3 4 5 6 7 8 9 10

Inconfortable

Confortable

**4. Quels facteurs pourraient augmenter votre degré de confort à prescrire des cannabinoïdes pour la prise en charge de la douleur chronique non cancéreuse?** *(Cochez plusieurs cases, s'il y a lieu)*

- Données cliniques/nouvelles études
- Données sur l'efficacité de ces produits
- Données sur l'innocuité à long terme
- Données sur la dépendance à long terme
- Lignes directrices/algorithmes qui intègrent les cannabinoïdes
- Nouvelles indications thérapeutiques
- Éducation et sensibilisation des patients
- Formation médicale continue
- Discussions entre pairs
- Autres (veuillez préciser) : \_\_\_\_\_

## Besoins en matière de formation face à l'utilisation et à la prescription de cannabinoïdes

### 5. Pour chacun des thèmes ci-dessous, veuillez entourer le chiffre qui décrit le mieux votre niveau de connaissance actuel et le niveau de connaissance que vous souhaiteriez avoir :

*Veuillez encercler le chiffre qui décrit le mieux votre opinion sur une échelle de 0 à 5, où 0 correspond à un niveau de connaissance nul et 5 à un excellent niveau de connaissance.*

| Niveau de connaissance actuel |   |   |   |   |           | Thèmes                                                                                           | Niveau de connaissance souhaité |   |   |   |   |           |
|-------------------------------|---|---|---|---|-----------|--------------------------------------------------------------------------------------------------|---------------------------------|---|---|---|---|-----------|
| Nul                           | → |   |   |   | Excellent |                                                                                                  | Nul                             | → |   |   |   | Excellent |
| 0                             | 1 | 2 | 3 | 4 | 5         | Douleur chronique non cancéreuse et son traitement                                               | 0                               | 1 | 2 | 3 | 4 | 5         |
| 0                             | 1 | 2 | 3 | 4 | 5         | Mécanismes d'action des cannabinoïdes (système endocannabinoïde)                                 | 0                               | 1 | 2 | 3 | 4 | 5         |
| 0                             | 1 | 2 | 3 | 4 | 5         | Cannabinoïdes disponibles (molécules existantes)                                                 | 0                               | 1 | 2 | 3 | 4 | 5         |
| 0                             | 1 | 2 | 3 | 4 | 5         | Prescription efficace des cannabinoïdes (toutes indications confondues)                          | 0                               | 1 | 2 | 3 | 4 | 5         |
| 0                             | 1 | 2 | 3 | 4 | 5         | Prescription de cannabinoïdes pour la prise en charge de la douleur chronique non cancéreuse     | 0                               | 1 | 2 | 3 | 4 | 5         |
| 0                             | 1 | 2 | 3 | 4 | 5         | Risques de l'utilisation des cannabinoïdes à long terme                                          | 0                               | 1 | 2 | 3 | 4 | 5         |
| 0                             | 1 | 2 | 3 | 4 | 5         | Lois et réglementation entourant l'utilisation de marijuana à des fins médicales de Santé Canada | 0                               | 1 | 2 | 3 | 4 | 5         |
| 0                             | 1 | 2 | 3 | 4 | 5         | Synergie d'action entre les cannabinoïdes et les opioïdes                                        | 0                               | 1 | 2 | 3 | 4 | 5         |

### 6. Selon votre expérience, pour quel(s) syndrome(s) de douleur chronique non cancéreuse les cannabinoïdes peuvent-ils être efficaces? (Cochez plusieurs cases, s'il y a lieu)

- |                                                |                                                             |
|------------------------------------------------|-------------------------------------------------------------|
| <input type="checkbox"/> Arthrite rhumatoïde   | <input type="checkbox"/> Fibromyalgie                       |
| <input type="checkbox"/> Arthrose              | <input type="checkbox"/> Lombalgie                          |
| <input type="checkbox"/> Céphalées de tension  | <input type="checkbox"/> Migraines                          |
| <input type="checkbox"/> Cervicalgie           | <input type="checkbox"/> Syndrome du côlon irritable        |
| <input type="checkbox"/> Douleur neuropathique | <input type="checkbox"/> Autres (veuillez préciser) : _____ |

\_\_\_\_\_

\_\_\_\_\_

## Barrières face à l'utilisation de cannabinoïdes

### 7. Selon vous, est-ce que les facteurs suivants sont des barrières à l'utilisation des cannabinoïdes pour la prise en charge de la douleur chronique non cancéreuse dans la pratique médicale actuelle?

*Veillez encercler le chiffre qui décrit le mieux votre opinion sur une échelle de 0 à 5, où 0 n'est pas une barrière et 5 est une barrière importante.*

| Barrières potentielles                                                     | Votre opinion                                        |   |   |   |   |   |
|----------------------------------------------------------------------------|------------------------------------------------------|---|---|---|---|---|
|                                                                            | N'est pas une barrière → Est une barrière importante |   |   |   |   |   |
| Degré d'efficacité des cannabinoïdes                                       | 0                                                    | 1 | 2 | 3 | 4 | 5 |
| Risques/Effets indésirables                                                | 0                                                    | 1 | 2 | 3 | 4 | 5 |
| Données probantes limitées                                                 | 0                                                    | 1 | 2 | 3 | 4 | 5 |
| Fenêtre thérapeutique étroite                                              | 0                                                    | 1 | 2 | 3 | 4 | 5 |
| Interactions médicamenteuses                                               | 0                                                    | 1 | 2 | 3 | 4 | 5 |
| Suivi nécessaire/Monitorage                                                | 0                                                    | 1 | 2 | 3 | 4 | 5 |
| Manque de lignes directrices pour leur utilisation                         | 0                                                    | 1 | 2 | 3 | 4 | 5 |
| N'est pas un premier choix de traitement                                   | 0                                                    | 1 | 2 | 3 | 4 | 5 |
| Les patients ont tendance à sous-rapporter leurs symptômes douloureux      | 0                                                    | 1 | 2 | 3 | 4 | 5 |
| Stigma social associé aux cannabinoïdes (tabous et préjugés)               | 0                                                    | 1 | 2 | 3 | 4 | 5 |
| Craintes des patients/de leur famille                                      | 0                                                    | 1 | 2 | 3 | 4 | 5 |
| Manque de formation des professionnels de la santé                         | 0                                                    | 1 | 2 | 3 | 4 | 5 |
| Considérations légales                                                     | 0                                                    | 1 | 2 | 3 | 4 | 5 |
| Possibilité que le patient utilise les cannabinoïdes dans un but récréatif | 0                                                    | 1 | 2 | 3 | 4 | 5 |
| Possibilité de vente sur le marché noir                                    | 0                                                    | 1 | 2 | 3 | 4 | 5 |
| Autres barrières et commentaires :                                         |                                                      |   |   |   |   |   |
| <hr/>                                                                      |                                                      |   |   |   |   |   |
| <hr/>                                                                      |                                                      |   |   |   |   |   |

## Caractéristiques de la pratique médicale

8. Êtes-vous un homme ou une femme?

<sub>0</sub> Homme    <sub>1</sub> Femme

9. Depuis combien d'années pratiquez-vous la médecine?

<sub>0</sub> 0-5    <sub>1</sub> 6-10    <sub>2</sub> 11-20    <sub>3</sub> 21+

10. Quelle est votre spécialité médicale?

<sub>0</sub> Médecin de famille/Omnipraticien    <sub>1</sub> Autre spécialité médicale

11. Au cours de la dernière année, dans quel type de milieu de pratique avez-vous passé la majorité de votre temps?

- <sub>0</sub> Hôpital - Clinique externe
- <sub>1</sub> Hôpital - Salle d'urgence
- <sub>2</sub> Groupe de médecine de famille (GMF)
- <sub>3</sub> Cabinet médical privé
- <sub>4</sub> Milieux offrant des soins palliatifs
- <sub>5</sub> CLSC - Centre local de services communautaires
- <sub>6</sub> CHSLD - Centre d'hébergement et de soins de longue durée
- <sub>7</sub> Agence de la santé et des services sociaux de l'Abitibi-Témiscamingue (ASSSAT)
- <sub>8</sub> Autre (veuillez préciser) : \_\_\_\_\_

12. Au cours de la dernière année, quelle était la proportion de votre pratique médicale consacrée à voir des patients? *(Veuillez encercler la réponse)*

0 %    10    20    30    40    50    60    70    80    90    100 %

13. En moyenne, combien de patients rencontrez-vous par semaine dans le cadre de votre pratique médicale?

patients/semaine

Aucun, car je n'effectue pas le suivi de patients



**14. Selon vous, quelle est la prévalence (%) de douleur chronique non cancéreuse au sein de votre clientèle?** *(Veuillez encercler la réponse)*

0 %   10   20   30   40   50   60   70   80   90   100 %

Non applicable, car je n'effectue pas le suivi de patients

**15. Durant la dernière année, quelle proportion de vos activités de formation médicale continue portait sur la douleur chronique non cancéreuse et son traitement?**

<sub>0</sub> 0 %   <sub>1</sub> 1-10 %   <sub>2</sub> 11-20 %   <sub>3</sub> 21-30 %   <sub>4</sub> 31-40 %   <sub>5</sub> >40 %

**16. Durant la dernière année, quelle proportion de vos activités de formation médicale continue portait sur les cannabinoïdes?**

<sub>0</sub> 0 %   <sub>1</sub> 1-10 %   <sub>2</sub> 11-20 %   <sub>3</sub> 21-30 %   <sub>4</sub> 31-40 %   <sub>5</sub> >40 %

---

Lorsque l'étude sera terminée, souhaiteriez-vous recevoir un résumé des résultats par courrier électronique?

Non

Oui : \_\_\_\_\_ @ \_\_\_\_\_

---

**Le questionnaire se termine ici**

**Veillez vous assurer d'avoir répondu à toutes les questions et nous retourner le questionnaire dans l'enveloppe-réponse au cours de la semaine prochaine afin d'éviter que nous vous relançons inutilement.**

**Merci beaucoup de votre participation!**

---
