# Supplementary material
Source: PubMed Central journal article supplement (PMC4565172)
Supplement: supp_3.2.E251_2014-0095_original_submission.pdf [file supp_3.2.E251_2014-0095_original_submission.pdf]

1 St-Amant et al.

2  
3  
4 **Prevalence and determinants of cannabinoid prescription for the management of**  
5 **chronic non-cancer pain: A postal survey of physicians**  
6  
7

8  
9 Huguette St-Amant, BSc, RN <sup>1</sup>

10 Mark A. Ware, MD, MSc <sup>2</sup>

11 Nancy Julien, PhD <sup>1</sup>

12 Anaïs Lacasse, PhD <sup>1</sup>

13  
14  
15  
16  
17  
18 <sup>1</sup> Département des sciences de la santé, Université du Québec en Abitibi-Témiscamingue,  
19 Rouyn-Noranda, Québec, Canada

20  
21 <sup>2</sup> The Alan Edwards Pain Management Unit, McGill University Health Centre,  
22 Montreal, Québec, Canada  
23  
24  
25  
26  
27  
28

29 **Support:** This study was funded by the Fonds institutionnel de la recherche et de la  
30 création (FIRC) of Université du Québec en Abitibi-Témiscamingue. We certify that there  
31 is no conflict of interest with any funding organization regarding the material discussed in  
32 the manuscript.  
33  
34  
35  
36  
37

38 **Correspondance:**

39 Anaïs Lacasse, PhD

40 Département des sciences de la santé

41 Université du Québec en Abitibi-Témiscamingue

42 445, boul. de l'Université

43 Rouyn-Noranda (Qc), J9X 5E4

44 Phone : (819) 762-0971, 2722

45 E-mail : [lacassea@uqat.ca](mailto:lacassea@uqat.ca)  
46  
47  
48  
49  
50  
51  
52  
53  
54  
55  
56  
57  
58  
59  
60

1 St-Amant et al.  
2  
3

4 **ABSTRACT**  
5  
6

7 **Objectives:** Cannabinoid prescription patterns for the management of chronic non-cancer  
8 pain (CNCP) are inadequately studied in Quebec as well as in the rest of Canada and  
9 internationally. The objectives of this study were to measure the prevalence and identify the  
10 determinants of cannabinoid prescription in the management of CNCP.  
11  
12

13  
14 **Methods:** In February 2013, a postal survey was sent out to all physicians of the Abitibi-  
15 Témiscamingue region (Quebec) using a modified Dillman method. Multivariate logistic  
16 regression models were used to identify determinants of cannabinoids prescription.  
17  
18

19  
20 **Results:** The response proportion was 52.2%, for a total of 166 physicians. A majority of  
21 physicians (79.2%) had not attended continuing medical education (CME) activities  
22 concerning cannabinoids in the past year. The prevalence of cannabinoid prescription for  
23 the management of CNCP was 23.0%, with 91.1% of these physicians prescribing  
24 cannabinoids to  $\leq 5$  patients. Among prescribers, 92.1% reported having prescribed  
25 nabilone, 18.4% medical marijuana, and 5.3% nabiximols. Multivariate modelling showed  
26 that physicians' comfort level with cannabinoid prescribing was the principal determinant  
27 of increased likelihood of cannabinoid prescription. Prescribers and non-prescribers  
28 reported that CME activities could increase their comfort level with cannabinoid  
29 prescribing. According to physicians, more studies are needed about the efficacy and safety  
30 of cannabinoids for the treatment of CNCP.  
31  
32  
33  
34  
35

36 **Conclusions:** Although cannabinoids are not products of first line in the therapeutic arsenal  
37 for the treatment of CNCP, they appear to have their place in the toolbox of physicians.  
38 Researchers and educators must work with physicians for optimal and informed  
39 cannabinoid prescription and use.  
40  
41  
42  
43  
44  
45  
46  
47  
48  
49  
50  
51  
52  
53  
54  
55  
56  
57  
58  
59  
60

1 St-Amant et al.  
2  
3

## 4 INTRODUCTION 5

6  
7 Between 11 to 29% of the Canadian population is affected by chronic pain (1-4) which is  
8 known to have serious consequences for the physical functioning, mental health and quality  
9 of life of those who suffer from it (3, 5-7). This health issue also represents a significant  
10 economic burden on the healthcare system (8, 9). To date, the treatment of chronic non-  
11 cancer pain (CNCP) remains suboptimal, mainly because of a lack of recognition of the  
12 condition, not enough training for healthcare professionals, the absence of effective  
13 treatment, the lack of access to pain treatment centers and the suboptimal usage of certain  
14 drug classes (5, 8, 10-13).  
15  
16  
17  
18  
19  
20  
21  
22  
23  
24  
25  
26  
27

28 Cannabinoids are a therapeutic modality for the management of CNCP that has been found  
29 effective and safe for some pain syndromes (14-17) while for others, it raises concerns (18,  
30 19). A number of pharmaceutical products are available in Canada such as nabilone  
31 (Césamet<sup>®</sup>), nabiximols (Sativex<sup>®</sup>) and medical marijuana. However, the usage prevalence  
32 of these products for the management of pain symptoms remains low (12-15%) (20-23).  
33 This limited use among patients could be partly explained by the stigma associated with  
34 smoking marijuana which also affects the products offered in pills or vaporizer (21, 24).  
35 Using cannabis for medical purposes is one of the treatments for which users are the most  
36 stigmatized regardless of their specific health condition (25). Moreover, the situation could  
37 be explained by physicians' lack of comfort regarding these therapeutic modalities (26). As  
38 of now, very few studies have been conducted to explore physicians' prescription practices  
39 and attitudes toward the use of cannabinoids for the treatment of CNCP in Canada (27).  
40  
41  
42  
43  
44  
45  
46  
47  
48  
49  
50  
51  
52  
53  
54  
55  
56  
57  
58  
59  
60

1 St-Amant et al.

2  
3  
4 It is important to better understand the cannabinoid prescription habits of physicians to  
5  
6 inform educational programs. The specific objectives of this study were to measure the  
7  
8 prevalence of cannabinoid prescription for the management of CNCP and identify the  
9  
10 determinants of cannabinoid prescription. Physicians' comfort level with cannabinoid  
11  
12 prescribing was also investigated. Considering the attention given to medical cannabis in  
13  
14 recent medical literature and the new Canadian medical marijuana regulations (28), this is  
15  
16 an important and timely topic.  
17  
18  
19

## 20 21 22 23 **METHODS**

### 24 **Study population**

25  
26 The present study was conducted among a convenience sample composed of the physicians  
27  
28 who are members of the *Collège des Médecins du Québec* (CMQ) and who are practicing  
29  
30 in one of the five main Health and Social Services Centres (HSSC) of the Abitibi-  
31  
32 Témiscamingue region of Quebec (Canada). As of January 2013, 318 physicians (family  
33  
34 physicians: n = 183, physicians practicing another medical speciality: n = 135) met these  
35  
36 criteria.  
37  
38  
39  
40  
41  
42  
43  
44

### 45 **Research design & Protocol**

46  
47 In February 2013, a cross-sectional postal survey was sent to all these physicians. The  
48  
49 protocol was approved by the human research ethics committee of the Université du  
50  
51 Québec en Abitibi-Témiscamingue.  
52  
53  
54  
55

56  
57 Participants completed a French language paper-and-pencil self-administered  
58  
59 questionnaires that they received by mail. A modified Dillman's Total Design Survey  
60

1 St-Amant et al.

2  
3  
4 Method (29) which implies four rounds of postal mail-outs was used. In the first round, an  
5  
6 introductory letter, the questionnaire and a pre-paid return envelop were mailed to  
7  
8 participants. The second round involved a reminder postcard sent one week after round one.  
9  
10 For round three, three weeks after the initial mail-out, a duplicate questionnaire as well as a  
11  
12 pre-paid return envelop were mailed to the participants who still had not returned their  
13  
14 questionnaire. Finally, in round four, duplicate questionnaires with a pre-paid return  
15  
16 envelop were again mailed out, this time seven weeks after round one. Registered mail was  
17  
18 not used for this seven-week packet contrary to what is suggested by Dillman.  
19  
20  
21

22  
23  
24 According to recommendations (30-32), some additional strategies were used in order to  
25  
26 further increase the response proportion. For instance, the cover letter had a blue  
27  
28 handwritten signature and a direct telephone contact for the principal investigator,  
29  
30 assurance of confidentiality was given, the correspondence was personalized, the  
31  
32 questionnaire consisted of 12 pages colour printed pages, and finally a teaser sentence "*By*  
33  
34 *opening this envelope, you will contribute to research conducted in Abitibi-Témiscamingue*  
35  
36 *by researchers from here!*" was printed on the mailing envelope. No financial incentives  
37  
38 were offered to physicians in exchange for their participation.  
39  
40  
41  
42  
43  
44  
45

46  
47 The first round resulted in a 15.7% response proportion (50 questionnaires), second round  
48  
49 increased the response proportion to 31.1% (49 questionnaires), round three further  
50  
51 increased the response proportion to 43.3% (42 questionnaires), and finally round four led  
52  
53 to a final response proportion of 52.2% (25 questionnaires). Comparison between the  
54  
55 characteristics of the physicians who participated in the study with those of the physicians  
56  
57  
58  
59  
60

1 St-Amant et al.

2  
3  
4 who did not participate was possible since information such as such as medical speciality  
5  
6 and belonging Health and Social Services Center are published in CMQ's directory.  
7  
8  
9

## 10 11 **Measures**

12  
13  
14 The questionnaire was designed to measure cannabinoid prescription patterns of physicians  
15  
16 specifically regarding CNCP (Appendix I). Measures included the past-year prevalence of  
17  
18 cannabinoid prescription, types of cannabinoids prescribed, prescription indications,  
19  
20 physicians' comfort level with cannabinoid prescribing (0 to 10 scale where 0 indicates  
21  
22 absolutely not comfortable and 10 indicates completely comfortable), characteristics of  
23  
24 physicians' medical practice, and factors that could increase physicians' comfort level with  
25  
26 cannabinoid prescribing. Listed factors (list of answer choices) were chosen according to  
27  
28 previous literature (27) with the option to specify other factors that could increase comfort  
29  
30 level.  
31  
32  
33  
34  
35  
36  
37

## 38 **Data Analysis**

39  
40 Descriptive statistics were conducted in order to describe the sample as well as the study  
41  
42 variables. Multivariate logistic regression models were used to identify the determinants of  
43  
44 cannabinoid prescribing for the management of CNCP (yes/no). The choice of variables to  
45  
46 be included in the final multivariate model was based on their association with this  
47  
48 dependant variable (all predictors with a p-value  $\leq 0.15$  in the univariate logistic regression  
49  
50 models in addition to the number of years of practice). Because of our substantial sample  
51  
52 size (n = 166), we are confident that the statistical power of the multivariate models was  
53  
54 sufficient based on the following rule of thumb: sample size  $\div 20 =$  the number of variables  
55  
56  
57  
58  
59  
60

1 St-Amant et al.

2  
3  
4 that can be included in the multivariate model (33, 34). All statistical analyses were  
5  
6 conducted with the IBM SPSS Statistics software version 19<sup>®</sup>.  
7  
8  
9

## 10 11 **RESULTS**

### 12 13 14 15 **Prescription habits**

16  
17  
18 Table 1 shows the socio-demographic characteristics of the 166 physicians who completed  
19  
20 the questionnaire as well as those of the 152 physicians who failed to return their  
21  
22 questionnaire. The only difference between the two groups was regarding the HSSC where  
23  
24 they were practicing. Specifically, physicians from the HSSC Rouyn-Noranda were more  
25  
26 likely to return their questionnaire than the other physicians. Of the non-responding  
27  
28 physicians, six called or wrote to the researchers to discuss their reasons for not  
29  
30 participating: not in a clinical practice (n = 1), doesn't treat chronic pain (n = 1), does not  
31  
32 prescribe any prescription drugs (n = 3), and cannabinoids are against their values (n = 1).  
33  
34  
35  
36  
37  
38  
39

40 Table 2 shows the characteristics of the participating physicians (family physicians: 56%).  
41  
42 A majority of physicians (79.2%) had not attended any continuing medical education  
43  
44 (CME) activities about cannabinoids in the past year. The overall prevalence of past-year  
45  
46 cannabinoid prescription for all potential indications was of 27.3%. As shown in Figure 1,  
47  
48 the prevalence of cannabinoid prescriptions specifically for the management of CNCP in  
49  
50 the present sample was 23.0%; 91.1% of these physicians prescribed cannabinoids to  $\leq 5$   
51  
52 patients during the past year. Among those who prescribed cannabinoids for the  
53  
54 management of CNCP, 92.1% prescribed nabilone (Césamet<sup>®</sup>), 18.4 % prescribed medical  
55  
56 marijuana, and 5.3 % prescribed nabiximols (Sativex<sup>®</sup>).  
57  
58  
59  
60

1 St-Amant et al.

2  
3  
4 When prescription prevalence was stratified by medical speciality, it was found that 34.8%  
5  
6 of family physicians vs. 8.2% specialists had prescribed cannabinoid for the management of  
7  
8 CNCP in the past year ( $p < 0.05$ ).  
9  
10

### 11 12 13 **Comfort with cannabinoid prescriptions**

14  
15  
16 Figure 2 shows the degree of comfort with prescribing cannabinoids that physicians have  
17  
18 reported. A minority of physicians reported a comfort level superior or equal to 6 on a 10  
19  
20 point scale for the prescription of cannabinoids in general (17.3%) or for the management  
21  
22 of CNCP (19.4%).  
23  
24

25  
26  
27  
28 When asked what factors could increase their comfort level with prescribing cannabinoids  
29  
30 for the management of CNCP (according to cannabinoid prescribers and non prescribers), a  
31  
32 majority of physicians mentioned attending CME activities about cannabinoids (68.4%),  
33  
34 having guidelines/algorithms including cannabinoids (67.8%), and having more clinical  
35  
36 data and new studies (50,0%).  
37  
38  
39  
40  
41

### 42 **Determinants of cannabinoid prescriptions**

43  
44 Table 3 shows the different variables associated with the prescription of cannabinoid for the  
45  
46 management of CNCP, both in the univariate logistic regression models and in the final  
47  
48 multivariate model. The univariate regression models, which do not allow for the  
49  
50 consideration of intercorrelations between independent variables, suggest that medical  
51  
52 speciality (specialists vs. family physicians OR : 0.17; 95%CI : 0.07-0.43), practicing in a  
53  
54 hospital environment (OR : 0.35; 95%CI : 0.16-0.75), practicing in a family medicine  
55  
56 group/family medicine unit (OR : 3.21; 95%CI : 1.48-6.96), higher weekly caseload (OR :



1 St-Amant et al.

2  
3  
4 1.02; 95%CI : 1.01-1.03), higher perception of CNCP prevalence in their clientele (OR :  
5  
6 1.03; 95%CI : 1.01-1.05), and higher degree of comfort with prescribing cannabinoids for  
7  
8 the management of CNCP (OR : 2.04; 95%CI : 1.64-2.54) were all associated with the  
9  
10 prescribing of cannabinoids for the management of CNCP ( $p < 0.05$ ). However, when the  
11  
12 intercorrelations between independent variables were considered (final multivariate model)  
13  
14 a higher degree of comfort with prescribing cannabinoids for the management of CNCP  
15  
16 (OR : 1.25; 95%CI : 1.01-1.55) was the only variable that significantly predicts the past-  
17  
18 year prescription of cannabinoids for the management of CNCP (controlling for the years  
19  
20 of practice, medical speciality, practicing environment, weekly caseload, perceptions of  
21  
22 CNCP prevalence in their clientele and the proportion of past-year attended CME about  
23  
24 cannabinoids).

25  
26  
27  
28  
29  
30  
31  
32  
33 Figure 3 shows more specifically the correlation between physicians' comfort level with  
34  
35 prescribing cannabinoids for the management of CNCP and the prevalence of prescription.  
36  
37 Results indicate that 83% of the variance in prescription prevalence can be explained by  
38  
39 physician's degree of comfort.  
40  
41  
42  
43

#### 44 **INTERPRETATION**

45  
46 The present results suggest that the proportion of physicians who have prescribed  
47  
48 cannabinoid for the management of CNCP is substantial, but this therapeutic modality is  
49  
50 prescribed to very few patients. Furthermore, the results suggest that the degree of comfort  
51  
52 with cannabinoids is low and that the more physicians are comfortable with prescribing  
53  
54 cannabinoid the more likely they are to prescribe cannabinoid products to their patients for  
55  
56 the management of CNCP.  
57  
58  
59  
60

1 St-Amant et al.

2  
3  
4 The degree of comfort of Canadian physicians regarding cannabinoid prescriptions for the  
5 management of CNCP has not been studied. The present results show that they are not  
6 comfortable prescribing cannabinoids, as roughly 80% of them reported a degree of  
7 comfort below 6 on a 0-10 scale. Furthermore, independent of years of practice, medical  
8 speciality, practice environment and the number of CME about cannabinoids attended in  
9 the past year, only the degree of comfort with prescribing cannabinoids was found to be a  
10 significant determinant of their prescription for the management of CNCP. It is suggested,  
11 based on the results of the present study, to target physicians' degree of comfort in the  
12 development of new CME activities. Other potential helping factors reported by physicians  
13 were the establishment of guidelines/algorithms for cannabinoids prescription. Chronic pain  
14 guidelines including these therapeutic agents exist (35, 36) but our findings suggest that  
15 these guidelines merit more dissemination. Past research has also found that having a  
16 personal positive experience with medical or recreative marijuana could increase  
17 physicians' degree of comfort with cannabinoids (37). This was however not assessed in the  
18 present study.  
19  
20  
21  
22  
23  
24  
25  
26  
27  
28  
29  
30  
31  
32  
33  
34  
35  
36  
37  
38  
39  
40  
41

42 Another important result is physicians' low estimation of CNCP prevalence. Specifically,  
43 they estimated the prevalence of CNCP in their clientele at 10% or less while it is well  
44 accepted that the prevalence of CNCP is around 25% for patients consulting in primary care  
45 (38). Furthermore, a high number of the physicians had not attended a training session  
46 about CNCP (34%) or about cannabinoids (79.2%) in the past year. Given that the literature  
47 suggests that Canadian healthcare professionals manifest a need for better training  
48 regarding the treatment of chronic pain (4, 39, 40), it would be beneficial to increase the  
49 number of training opportunities.  
50  
51  
52  
53  
54  
55  
56  
57  
58  
59  
60

1 St-Amant et al.

2  
3  
4 Finally, although close to a quarter of the physicians (23,0%) reported having prescribed  
5  
6  
7  
8  
9  
10  
11  
12  
13  
14  
15  
16  
17  
18  
19  
20  
21  
22  
23  
24  
25  
26  
27  
28  
29  
30  
31  
32  
33  
34  
35  
36  
37  
38  
39  
40  
41  
42  
43  
44  
45  
46  
47  
48  
49  
50  
51  
52  
53  
54  
55  
56  
57  
58  
59  
60  
Finally, although close to a quarter of the physicians (23,0%) reported having prescribed  
cannabinoids for CNCP, most of them (91.1%) had only prescribed it to 5 or less patients in  
the preceding 12 months which suggests a low usage of these products among CNCP  
patients. To date, few studies of this kind have been conducted with samples of physicians.  
In the only other Canadian study conducted, the prescription prevalence was of 35% for  
family physicians and 33% for physicians with a different medical speciality (27). In the  
present study, when the prescription prevalence is stratified by medical speciality, the  
results are in line with those reported by Ziemianski et al. (27) for family physicians  
(34.8%) but significantly less physicians with a different medical speciality prescribed  
cannabinoids in our sample (8.2%). This difference could be explained by the fact that the  
Ziemianski et al. (27) sample was composed of physicians who participated in CME  
activities about cannabinoids. Their sample may have been more representative of  
physicians interested by this drug class and not necessarily representative of all physicians.  
Nonetheless, increased access to CME activities about cannabinoids could help increase the  
comfort of physicians with this drug class for the management of CNCP.

### 42 **Limitations and Strengths**

43  
44  
45  
46  
47  
48  
49  
50  
51  
52  
53  
54  
55  
56  
57  
58  
59  
60  
The present study has a number of significant strengths such as the usage of a standardized  
data collection method, a high response proportion in the context of a physician survey, the  
inclusion of numerous potential confounding variables in the data analyses, and a  
satisfactory statistical power due to the sample size. However, a number of limitations must  
be mentioned. First, even though the participating and non participating physicians were  
similar on a large number of characteristics, more physicians from one HSSC participated  
compared with the other 4 HSSC of the administrative region where the study was

1 St-Amant et al.

2  
3  
4 conducted. Also, it is possible that non responders decided not to complete the  
5  
6  
7 questionnaire because they do not prescribe cannabinoids or are not comfortable with them.  
8  
9 If that was to be true, the present results may present an over-estimation of cannabinoid  
10  
11 prescription prevalence. Finally, the present results may not be generalizable to all the  
12  
13 clinical contexts of Canada. However, it is probable that the training needs identified by the  
14  
15 physicians of the present study are generalizable to other physicians who are not familiar  
16  
17  
18 with this drug class.  
19

## 20 21 22 23 **Conclusion**

24  
25 The results of the present study suggest that cannabinoids are not often prescribed for the  
26  
27 management of CNCP and that physicians are not comfortable with this drug class. This  
28  
29 degree of discomfort could be addressed by CME activities. Future research is nonetheless  
30  
31 needed in order to replicate the present results in different regions and to determine the  
32  
33 objective impact on prescription of offering more CME activities about cannabinoids.  
34  
35 Although cannabinoids are not products of first line in the therapeutic arsenal for the  
36  
37 treatment of CNCP, they have their place in the toolbox of physicians. Researchers and  
38  
39  
40 educators must work with physicians for optimal and informed cannabinoid prescription  
41  
42  
43 and use.  
44  
45  
46  
47  
48  
49  
50  
51  
52  
53  
54  
55  
56  
57  
58  
59  
60

1 St-Amant et al.  
2  
3

4 **ACKNOWLEDGMENTS**  
5

6 We would like to thank Geneviève L. Lavigne, Ph.D., who helped with the manuscript and  
7 provided critical comments. Special thanks to all participating physicians, to the Canadian  
8 Pain Society (CPS) and the Quebec Pain Research Network (QPRN), who awarded  
9 master's scholarships to Ms St-Amant, and to the Fonds institutionnel de la recherche et de  
10 la création (FIRC) of Université du Québec en Abitibi-Témiscamingue who funded the  
11 study.  
12  
13  
14  
15  
16  
17  
18  
19  
20  
21  
22  
23  
24  
25  
26  
27  
28  
29  
30  
31  
32  
33  
34  
35  
36  
37  
38  
39  
40  
41  
42  
43  
44  
45  
46  
47  
48  
49  
50  
51  
52  
53  
54  
55  
56  
57  
58  
59  
60

Confidential

1 St-Amant et al.

2  
3  
4 **REFERENCES**

- 5  
6  
7 1. Moulin DE, Clark AJ, Speechley M, Morley-Forster PK. Chronic pain in Canada--  
8 prevalence, treatment, impact and the role of opioid analgesia. *Pain Research &*  
9 *Management*. 2002;7(4):179-84.
- 10  
11 2. Ramage-Morin PL, Gilmour H. Chronic pain at ages 12 to 44. *Health Rep*.  
12 2010;21(4):53-61.
- 13  
14 3. Reitsma ML, Tranmer JE, Buchanan DM, VanDenKerkhof EG. The epidemiology of  
15 chronic pain in Canadian men and women between 1994 and 2007: results from the  
16 longitudinal component of the National Population Health Survey. *Pain Research &*  
17 *Management*. 2012;17(3):166-72.
- 18  
19 4. Boulanger A, Clark AJ, Squire P, Cui E, Horbay GL. Chronic pain in Canada: have we  
20 improved our management of chronic noncancer pain? *Pain Research & Management*.  
21 2007;12(1):39-47.
- 22  
23 5. Ashburn MA, Staats PS. Management of chronic pain. *Lancet*. 1999;353(9167):1865-  
24 9.
- 25  
26 6. Gureje O, Von Korff M, Simon GE, Gater R. Persistent pain and well-being: a World  
27 Health Organization study in primary care. *JAMA*. 1998;280(2):147-51.
- 28  
29 7. Ohayon MM, Schatzberg AF. Using chronic pain to predict depressive morbidity in the  
30 general population. *Archives of General Psychiatry*. 2003;60(1):39-47.
- 31  
32 8. Kronborg C, Handberg G, Axelsen F. Health care costs, work productivity and activity  
33 impairment in non-malignant chronic pain patients. *The European journal of health*  
34 *economics : HEPAC : health economics in prevention and care*. 2009;10(1):5-13.
- 35  
36 9. Guerriere DN, Choiniere M, Dion D, Peng P, Stafford-Coyte E, Zagorski B, et al. The  
37 Canadian STOP-PAIN project - Part 2: What is the cost of pain for patients on waitlists  
38 of multidisciplinary pain treatment facilities? *Can J Anaesth*. 2010;57(6):549-58.
- 39  
40 10. MacDonald NE, Flegel K, Hebert PC, Stanbrook MB. Better management of chronic  
41 pain care for all. *CMAJ : Canadian Medical Association journal = journal de*  
42 *l'Association medicale canadienne*. 2011;183(16):1815.
- 43  
44 11. Sarzi-Puttini P, Vellucci R, Zuccaro SM, Cherubino P, Labianca R, Fornasari D. The  
45 appropriate treatment of chronic pain. *Clinical drug investigation*. 2012;32 Suppl 1:21-  
46 33.
- 47  
48 12. Zuccaro SM, Vellucci R, Sarzi-Puttini P, Cherubino P, Labianca R, Fornasari D.  
49 Barriers to pain management : focus on opioid therapy. *Clinical drug investigation*.  
50 2012;32 Suppl 1:11-9.
- 51  
52  
53  
54  
55  
56  
57  
58  
59  
60

1 St-Amant et al.

- 2
- 3
- 4
- 5 13. Sessle BJ. The pain crisis: what it is and what can be done. *Pain research and*
- 6 *treatment*. 2012;2012:703947.
- 7
- 8 14. Bonfa L, Vinagre RC, de Figueiredo NV. Cannabinoids in chronic pain and palliative
- 9 *care*. *Revista brasileira de anesthesiologia*. 2008;58(3):267-79.
- 10
- 11 15. Cohen SP. Cannabinoids for chronic pain. *BMJ (Clinical research ed)*.
- 12 *2008;336(7637):167-8*.
- 13
- 14 16. Elikkottil J, Gupta P, Gupta K. The analgesic potential of cannabinoids. *Journal of*
- 15 *opioid management*. 2009;5(6):341-57.
- 16
- 17
- 18 17. Lynch ME, Campbell F. Cannabinoids for Treatment of Chronic Non-Cancer Pain: A
- 19 *Systematic Review of Randomized Trials*. *British journal of clinical pharmacology*.
- 20 *2011;72(5):735-44*.
- 21
- 22 18. Kahan M, Srivastava A. New medical marijuana regulations: the coming storm. *CMAJ*
- 23 *: Canadian Medical Association journal = journal de l'Association medicale*
- 24 *canadienne*. 2014;186(12):895-6.
- 25
- 26
- 27 19. Fitzcharles MA, Clauw DJ, Ste-Marie PA, Shir Y. The dilemma of medical marijuana
- 28 *use by rheumatology patients*. *Arthritis care & research*. 2014;66(6):797-801.
- 29
- 30 20. Choinière M, Dion D, Peng P, Banner R, Barton PM, Boulanger A, et al. The Canadian
- 31 *STOP-PAIN project - Part 1: Who are the patients on the waitlists of multidisciplinary*
- 32 *pain treatment facilities? Canadian journal of anaesthesia = Journal canadien*
- 33 *d'anesthesie*. 2010;57(6):539-48.
- 34
- 35
- 36 21. Clark AJ, Ware MA, Yazer E, Murray TJ, Lynch ME. Patterns of cannabis use among
- 37 *patients with multiple sclerosis*. *Neurology*. 2004;62(11):2098-100.
- 38
- 39 22. Ware MA, Doyle CR, Woods R, Lynch ME, Clark AJ. Cannabis use for chronic non-
- 40 *cancer pain: results of a prospective survey*. *Pain*. 2003;102(1-2):211-6.
- 41
- 42 23. Ste-Marie PA, Fitzcharles M-A. Cannabinoid use in fibromyalgia is associated with
- 43 *male gender, opioid use and drug seeking behaviour*. *Pain Research & Management*.
- 44 *2012;17(3):224*.
- 45
- 46 24. Gill A, Williams ACdC. Preliminary study of chronic pain patients' concerns about
- 47 *cannabinoids as analgesics*. *The Clinical journal of pain*. 2001;17(3):245-8.
- 48
- 49 25. Bottorff JL, Bissell LJ, Balneaves LG, Oliffe JL, Capler NR, Buxton J. Perceptions of
- 50 *cannabis as a stigmatized medicine: a qualitative descriptive study*. *Harm reduction*
- 51 *journal*. 2013;10:2.
- 52
- 53 26. Juurlink DN. Medicinal cannabis: Time to lighten up? *CMAJ : Canadian Medical*
- 54 *Association journal = journal de l'Association medicale canadienne*. 2014;186(12):897-
- 55 *8*.
- 56
- 57
- 58
- 59
- 60

1 St-Amant et al.

- 2
- 3
- 4 27. Ziemianski D, Tekanoff R, Luconi F, Ware M. Cannabinoids in clinical practice:  
5 experiences and educational needs. *Pain Research & Management*. 2012;17(3):229.
- 6
- 7
- 8 28. Health Canada. *Medical Use of Marijuana*. Ottawa: Government of Canada, 2014.
- 9
- 10 29. Dillman DA. *Mail and telephone surveys*. New-York: Wiley Interscience; 1978.
- 11
- 12 30. Field TS, Cadoret CA, Brown ML, Ford M, Greene SM, Hill D, et al. Surveying  
13 physicians: do components of the "Total Design Approach" to optimizing survey  
14 response rates apply to physicians? *Med Care*. 2002;40(7):596-605.
- 15
- 16
- 17 31. Thorpe C, Ryan B, McLean SL, Burt A, Stewart M, Brown JB, et al. How to obtain  
18 excellent response rates when surveying physicians. *Fam Pract*. 2009;26(1):65-8.
- 19
- 20 32. Hoddinott SN, Bass MJ. The dillman total design survey method. *Canadian family  
21 physician Medecin de famille canadien*. 1986;32:2366-8.
- 22
- 23 33. Vittinghoff E, McCulloch CE. Relaxing the Rule of Ten Events per Variable in  
24 Logistic and Cox Regression. *Am J Epidemiol*. 2007;165(6):710-8.
- 25
- 26
- 27 34. Harrell FE, Jr., Lee KL, Mark DB. Multivariable prognostic models: issues in  
28 developing models, evaluating assumptions and adequacy, and measuring and reducing  
29 errors. *Statistics in medicine*. 1996;15(4):361-87.
- 30
- 31 35. Clark AJ, Lynch ME, Ware M, Beaulieu P, McGilveray IJ, Gourlay D. Guidelines for  
32 the use of cannabinoid compounds in chronic pain. *Pain research & management : the  
33 journal of the Canadian Pain Society = journal de la societe canadienne pour le  
34 traitement de la douleur*. 2005;10 Suppl A:44A-6A.
- 35
- 36
- 37 36. Attal N, Cruccu G, Haanpaa M, Hansson P, Jensen TS, Nurmikko T, et al. EFNS  
38 guidelines on pharmacological treatment of neuropathic pain. *European journal of  
39 neurology : the official journal of the European Federation of Neurological Societies*.  
40 2006;13(11):1153-69.
- 41
- 42
- 43 37. Kondrad E, Reid A. Colorado family physicians' attitudes toward medical marijuana.  
44 *Journal of the American Board of Family Medicine : JABFM*. 2013;26(1):52-60.
- 45
- 46 38. Gureje O, Simon GE, Von Korff M. A cross-national study of the course of persistent  
47 pain in primary care. *Pain*. 2001;92(1-2):195-200.
- 48
- 49 39. Bergeron D, Gallagher F, Bourgault P. Analyse des activités en gestion de la douleur  
50 chronique réalisées par le personnel infirmier des groupes de médecine de famille  
51 (GMF). *Pain Research and Management*. 2011;16(2):102.
- 52
- 53
- 54 40. Leroux-Lapointe V, Choinière M, Dion D, Lamarre D, Thiffault R, Lussier D, et al.  
55 The ACCORD program: Knowledge, attitudes and beliefs of community pharmacists  
56 about non-cancer chronic pain. *Can J Clin Pharmacol*. 2010;17(1):e-116.
- 57
- 58
- 59
- 60



**Table 1. Comparison between the characteristics of the physicians who participated in the study with those of the physicians who did not participate.**

| <b>Physicians' characteristics</b> | <b>Participants<br/>(n=166)</b> | <b>Non participants<br/>(n=152)</b> |
|------------------------------------|---------------------------------|-------------------------------------|
| Medical speciality – n (%)         |                                 |                                     |
| Family physician                   | 93 (56.0)                       | 87 (57.2)                           |
| Other speciality                   | 73 (44.0)                       | 65 (42.8)                           |
| Sexe – n (%)                       |                                 |                                     |
| Male                               | 77 (46.4)                       | 81 (53.3)                           |
| Female                             | 89 (53.6)                       | 71 (46.7)                           |
| HSSC – n (%)                       |                                 |                                     |
| HSSC Rouyn-Noranda                 | 62 (37.3)                       | 34 (22.4)                           |
| HSSC Vallée-de-l'Or                | 46 (27.7)                       | 34 (22.4)                           |
| Other HSSC <sup>a</sup>            | 58 (34.9)                       | 84 (55.3)                           |

HSSC = Health and Social Services Centers

<sup>a</sup> HSSC Aurores-Boréales, HSSC Témiscamingue and HSSC Les Eskers de l'Abitibi.

St-Amant et al.

**Table 2. Characteristics of participating physicians**

| Characteristics                                                                     | n= 166        |
|-------------------------------------------------------------------------------------|---------------|
| Socio-demographic characteristics                                                   |               |
| Years of practice – n (%)                                                           |               |
| 0-5                                                                                 | 30 (18.5)     |
| 6-10                                                                                | 20 (12.3)     |
| 11-20                                                                               | 50 (30.9)     |
| 21+                                                                                 | 62 (38.3)     |
| Sexe – n (%)                                                                        |               |
| Female                                                                              | 89 (53.6)     |
| Male                                                                                | 77 (46.4)     |
| Medical speciality – n (%)                                                          |               |
| Family physician/General partitionner                                               | 93 (56.0)     |
| Other medical speciality                                                            | 73 (44.0)     |
| Type of medical work environment frequented in the past year– n (%) <sup>a</sup>    |               |
| Hospital environment (excluding the ER)                                             | 87 (53.4)     |
| FMU/FMG                                                                             | 43 (26.4)     |
| ER                                                                                  | 35 (21.5)     |
| Private medical office                                                              | 21 (12.9)     |
| Environment offering palliative care                                                | 11 (6.7)      |
| CLSC (Local Community Services Centers)                                             | 12 (7.4)      |
| CHSLD (Long-term care facility)                                                     | 8 (4.9)       |
| ASSSAT (Health and social services agency of the Abitibi-Témiscamingue region)      | 6 (3.7)       |
| Other                                                                               | 5 (3.1)       |
| Medical practice characteristics                                                    |               |
| Proportion of medical practice dedicated to seeing patients in the past year (%)    |               |
| Mean ± SD                                                                           | 82.40 ± 24.25 |
| Median                                                                              | 90            |
| Min                                                                                 | 0             |
| Max                                                                                 | 100           |
| Proportion of medical practice dedicated to seeing patients in the past year– n (%) |               |
| <50 %                                                                               | 13 (8.1)      |
| ≥50 %                                                                               | 147 (91.9)    |
| Number of patients seen each week within the medical practice                       |               |
| Mean ± SD                                                                           | 58.42 ± 37.24 |
| Median                                                                              | 50            |
| Min                                                                                 | 0             |
| Max                                                                                 | 250           |

St-Amant et al.

|                                                                                                                 |                   |
|-----------------------------------------------------------------------------------------------------------------|-------------------|
| Prevalence of Chronic Non-Cancer Pain in your clientele (%)                                                     |                   |
| Mean $\pm$ SD                                                                                                   | 22.06 $\pm$ 17.44 |
| Median                                                                                                          | 20.0              |
| Min                                                                                                             | 0                 |
| Max                                                                                                             | 100               |
| Prevalence of Chronic Non-Cancer Pain in your clientele – n (%)                                                 |                   |
| <50 %                                                                                                           | 146 (91.8)        |
| $\geq$ 50 %                                                                                                     | 13 (8.2)          |
| Proportion of the Continuing Medical Education activities about CNCP and its treatment in the past year – n (%) |                   |
| 0 %                                                                                                             | 54 (34.0)         |
| 1-10 %                                                                                                          | 71 (44.7)         |
| 11-20 %                                                                                                         | 28 (17.6)         |
| 21-30 %                                                                                                         | 4 (2.5)           |
| 31-40 %                                                                                                         | 2 (1.3)           |
| Proportion of the Continuing Medical Education activities about cannabinoids in the past year– n (%)            |                   |
| 0 %                                                                                                             | 126 (79.2)        |
| 1-10 %                                                                                                          | 32 (20.1)         |
| 11-20 %                                                                                                         | 1 (0.6)           |

Proportion of missing data  $\leq$  4.2 %; CNCP = Chronic Non-Cancer Pain, FMG = Family medicine group, FMU = Family medicine unit

<sup>a</sup> Categories are not mutually exclusive. A physician could be working in more than one environment.

St-Amant et al.

**Table 3. Physicians' characteristics and their medical practice in relation with their prevalence of cannabinoid prescriptions for the management of CNCP.**

| Predictors                                                        | No<br>(n = 127) | Yes<br>(n = 38) | p-value of<br>the<br>univariate<br>logistic<br>regression | Crude OR (95% CI)     | Adjusted OR (95% CI) *** |
|-------------------------------------------------------------------|-----------------|-----------------|-----------------------------------------------------------|-----------------------|--------------------------|
| Years of practice – n (%)                                         |                 |                 |                                                           |                       |                          |
| 0- 20 years (référence)                                           | 92 (62.6)       | 8 (57.1)        |                                                           | -                     | -                        |
| 21 years and more                                                 | 55 (37.4)       | 6 (42.9)        | 0.689                                                     | 1.255 (0.413 - 3.807) | 0.704 (0.174-2.838)      |
| Sexe – n (%)                                                      |                 |                 |                                                           |                       |                          |
| Male (référence)                                                  | 59 (46.5)       | 18 (47.4)       |                                                           | -                     |                          |
| Female                                                            | 68 (53.5)       | 20 (52.6)       | 0.921                                                     | 0.964 (0.466-1.993)   |                          |
| Medical speciality – n (%)                                        |                 |                 |                                                           |                       |                          |
| Family physicians (référence)                                     | 60 (47.2)       | 32 (84.2)       |                                                           | -                     | -                        |
| Other medical speciality                                          | 67 (52.8)       | 6 (15.8)        | 0.000 *                                                   | 0.168 (0.066-0.429)   | 0.140 (0.011- 1.711)     |
| Practice mostly in hospital environment<br>(excluding ER) – n (%) |                 |                 |                                                           |                       |                          |
| No (référence)                                                    | 50 (40.3)       | 25 (65.8)       |                                                           | -                     | -                        |
| Yes                                                               | 74 (59.7)       | 13 (34.2)       | 0.007 *                                                   | 0.351 (0.164-0.751)   | 1.898 (0.423-8.509)      |
| Practice mostly in the ER – n (%)                                 |                 |                 |                                                           |                       |                          |
| No (référence)                                                    | 98 (79.0)       | 29 (76.3)       |                                                           | -                     |                          |
| Yes                                                               | 26 (21.0)       | 9 (23.7)        | 0.722                                                     | 1.170 (0.493-2.775)   |                          |
| Practice mostly in a FMG/FMU – n (%)                              |                 |                 |                                                           |                       |                          |
| No (référence)                                                    |                 |                 |                                                           |                       |                          |
| Yes                                                               | 99 (79.8)       | 21 (55.3)       |                                                           | -                     | -                        |
|                                                                   | 25 (20.2)       | 17 (44.7)       | 0.003 *                                                   | 3.206 (1.476-6.962)   | 1.521 (0.395-5.856)      |
| Practice mostly in private medical office<br>– n (%)              |                 |                 |                                                           |                       |                          |
| No (référence)                                                    | 111 (89.5)      | 30 (78.9)       |                                                           | -                     | -                        |
| Yes                                                               | 13 (10.5)       | 8 (21.1)        | 0.096 **                                                  | 2.277 (0.864-5.998)   | 1.330 (0.288-6.154)      |

St-Amant et al.

|                                                                                                                       |               |               |         |                     |                            |
|-----------------------------------------------------------------------------------------------------------------------|---------------|---------------|---------|---------------------|----------------------------|
| Proportion of the medical practice dedicated to seeing patients in the past year (%) – Mean ± SD                      | 80.29 ± 28.35 | 86.32 ± 14.03 | 0.215   | 1.011 (0.994-1.029) |                            |
| Number of patients seen in a week in the medical practice– Mean ± SD                                                  | 52.30 ± 33.09 | 73.63 ± 47.28 | 0.005 * | 1.015 (1.005-1.025) | 1.006 (0.992-1.021)        |
| Perception of CNCP prevalence in their clientele (%) – Mean ± SD                                                      | 19,73 ± 15,14 | 28,55 ± 22,21 | 0,011 * | 1,027 (1,006-1,049) | 1,010 (0,976-1,044)        |
| Proportion of Continuing Medical Educations activities about CNCP and its treatment in the past year, recoded – n (%) |               |               |         |                     |                            |
| 0 - 10% (reference)                                                                                                   | 114 (79,2)    | 11 (78,6)     |         |                     |                            |
| 11 - 40%                                                                                                              | 30 (20,8)     | 3 (21,4)      | 0,958   | 1,036 (0,272-3,952) |                            |
| Proportion of Continuing Medical Education activities about cannabinoids in the past year, recoded – n (%)            |               |               |         |                     |                            |
| 0% (reference)                                                                                                        | 116 (80,6)    | 10 (71,4)     |         |                     |                            |
| 1 - 20%                                                                                                               | 28 (19,4)     | 4 (28,6)      | 0.421   | 1.657 (0.484-5.674) |                            |
| Degree of current comfort with prescribing cannabinoids for the management of CNCP – Mean ± SD                        | 1.39 ± 1.85   | 5.92 ± 2.54   | 0.000 * | 2.039 (1.640-2.535) | <b>1.252 (1.009-1.553)</b> |

CNCP = Chronic Non-Cancer Pain, FMG = Family medicine group, FMU = Family medicine unit

\* p-value < 0.05

\*\* 0.05 ≤ p-value ≤ 0.15

\*\*\* Estimation of the adjusted OR for all predictors with a p-value ≤ 0.15 in the univariate logistic regression models. We also choose to enter the number of years of practice in the multivariate model.

1 St-Amant et al.

2  
3  
4 **FIGURES**

5  
6  
7 **Figure 1. Cannabinoid prescription prevalence in the past year for a number of**  
8 **therapeutic indications among participating physicians.**

9  
10 **Figure 2. Degree of current comfort of participating physicians with the prescription**  
11 **of cannabinoids.**

12  
13 **Figure 3. Correlation between physicians' degree of comfort in prescribing**  
14 **cannabinoids for the management of CNCP and the past-year prevalence of**  
15 **cannabinoid prescriptions for the management of CNCP.**  
16  
17  
18  
19  
20  
21  
22  
23  
24  
25  
26  
27  
28  
29  
30  
31  
32  
33  
34  
35  
36  
37  
38  
39  
40  
41  
42  
43  
44  
45  
46  
47  
48  
49  
50  
51  
52  
53  
54  
55  
56  
57  
58  
59  
60

Confidential

St-Amant et al.

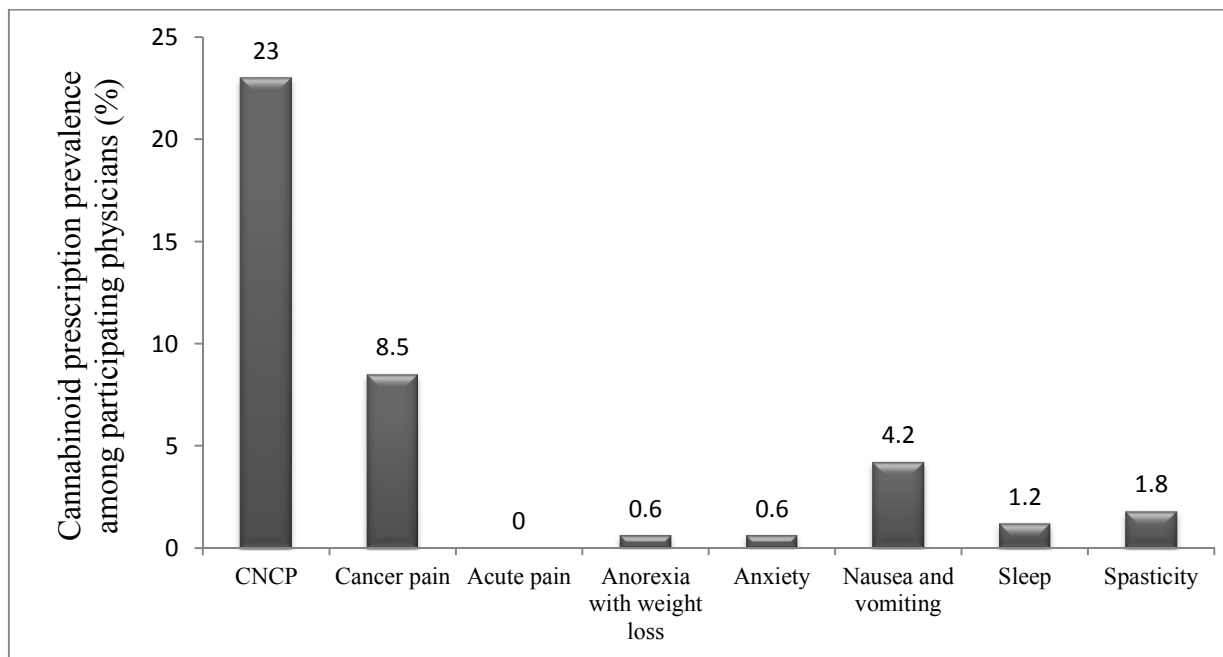

**Figure 1. Cannabinoid prescription prevalence in the past year for a number of therapeutic indications among participating physicians.**

CNCP = Chronic Non-Cancer Pain

Proportion of missing data = 0.6 %.

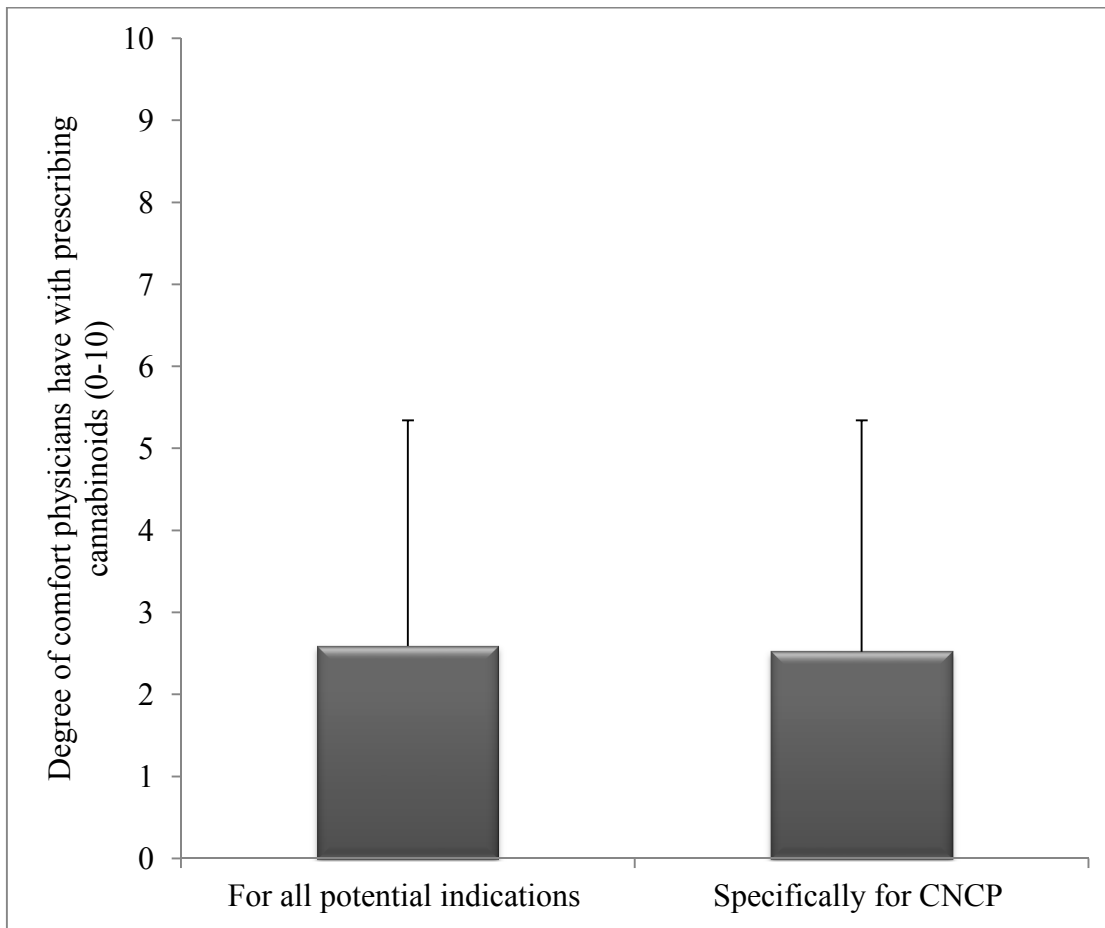

**Figure 2. Degree of current comfort of participating physicians with the prescription of cannabinoids.**

CNCP = Chronic Non-Cancer Pain

Proportion of missing data = 6.0-6.6 %.



St-Amant et al.

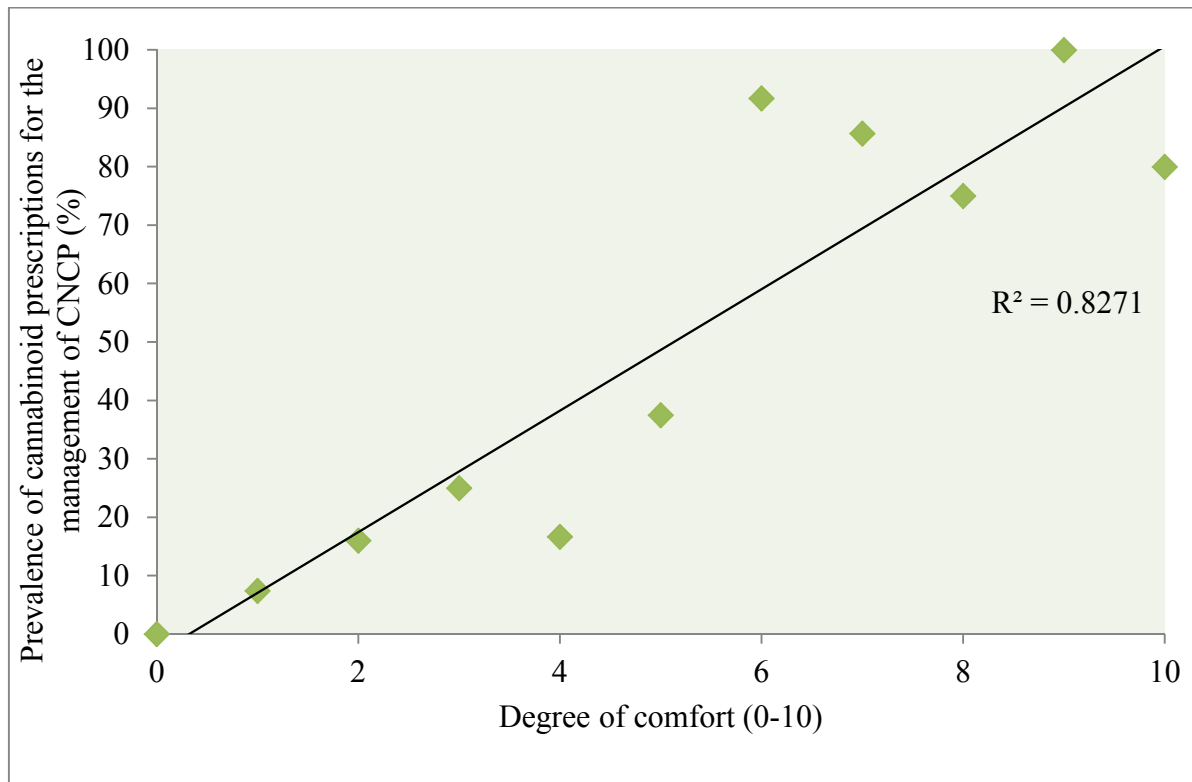

**Figure 3. Correlation between physicians' degree of comfort in prescribing cannabinoids for the management of CNCP and the past-year prevalence of cannabinoid prescriptions for the management of CNCP.**

1  
2  
3  
4  
5  
6  
7  
8  
9  
10  
11  
12  
13  
14  
15  
16  
17  
18  
19  
20  
21  
22  
23  
24  
25  
26  
27  
28  
29  
30  
31  
32  
33  
34  
35  
36  
37  
38  
39  
40  
41  
42  
43  
44  
45  
46  
47  
48  
49  
50  
51  
52  
53  
54  
55  
56  
57  
58  
59  
60

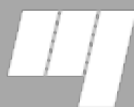

Université du Québec  
en Abitibi-Témiscamingue

**La prescription de  
cannabinoïdes pour la  
prise en charge de la  
douleur chronique non  
cancéreuse en Abitibi-  
Témiscamingue**

# **Questionnaire adressé aux médecins**

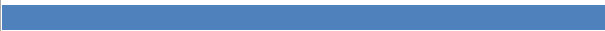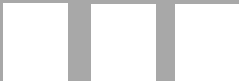

## Préambule

La douleur chronique, qui a des répercussions importantes sur le fonctionnement physique et psychologique des personnes qui en souffrent, touche environ un adulte sur cinq au Québec. Les syndromes de douleur chronique non cancéreuse comprennent notamment la lombalgie, la cervicalgie, l'arthrite rhumatoïde, l'arthrose, les migraines, les céphalées, la fibromyalgie, le syndrome du côlon irritable, les névralgies ainsi que les douleurs chroniques post-traumatiques ou postchirurgicales.

Parmi les modalités thérapeutiques permettant une prise en charge de la douleur chronique, les cannabinoïdes naturels et synthétiques se sont avérés efficaces et sécuritaires pour certains de ces syndromes. Ces produits pharmacologiques comprennent le nabilone (Césamet<sup>®</sup>), le dronabinol (Marinol<sup>®</sup>), le THC/cannabidiol (Sativex<sup>®</sup>) et la marijuana à des fins médicales. Ceux-ci sont tous disponibles avec ordonnance au Canada.

Les questions suivantes portent sur les tendances de prescription, le degré de confort, les besoins en matière de formation et les barrières face à la prescription de cannabinoïdes. Nous vous invitons à inscrire vos réponses au meilleur de votre connaissance.

## Tendances de prescription de cannabinoïdes

### 1. Au cours de la dernière année, avez-vous prescrit des cannabinoïdes?

<sub>0</sub> Non    <sub>1</sub> Oui

#### Si oui, lesquels? *(Cochez plusieurs cases, s'il y a lieu)*

- Nabilone (Césamet<sup>®</sup>)
- Dronabinol (Marinol<sup>®</sup>)
- THC/cannabidiol (Sativex<sup>®</sup>)
- Marihuana à des fins médicale (Programme d'accès de Santé Canada)

#### Si oui, pour quel(s) problème(s) de santé?

*(Cochez plusieurs cases, s'il y a lieu)*

- Douleur chronique non cancéreuse
- Douleur chronique cancéreuse
- Douleur aiguë
- Anorexie avec perte de poids
- Anxiété
- Nausées et vomissements
- Sommeil
- Spasticité
- Autres (veuillez préciser) : \_\_\_\_\_

#### Si oui, à combien de patients (dans la dernière année)?

<sub>0</sub> 1-5    <sub>1</sub> 6-10    <sub>2</sub> 11-20    <sub>3</sub> 21-50    <sub>4</sub> >50

#### Si non, pourquoi?

---



---



---

## Degré de confort envers la prescription de cannabinoïdes

2. Actuellement, quel est votre degré de confort à prescrire des cannabinoïdes (toutes indications confondues)? *(Veuillez encercler la réponse)*

0 1 2 3 4 5 6 7 8 9 10  
Inconfortable Confortable

3. Actuellement, quel est votre degré de confort à prescrire des cannabinoïdes pour la prise en charge de la douleur chronique non cancéreuse? *(Veuillez encercler la réponse)*

0 1 2 3 4 5 6 7 8 9 10  
Inconfortable Confortable

4. Quels facteurs pourraient augmenter votre degré de confort à prescrire des cannabinoïdes pour la prise en charge de la douleur chronique non cancéreuse? *(Cochez plusieurs cases, s'il y a lieu)*

- Données cliniques/nouvelles études
- Données sur l'efficacité de ces produits
- Données sur l'innocuité à long terme
- Données sur la dépendance à long terme
- Lignes directrices/algorithmes qui intègrent les cannabinoïdes
- Nouvelles indications thérapeutiques
- Éducation et sensibilisation des patients
- Formation médicale continue
- Discussions entre pairs
- Autres (veuillez préciser) : \_\_\_\_\_

## Besoins en matière de formation face à l'utilisation et à la prescription de cannabinoïdes

### 5. Pour chacun des thèmes ci-dessous, veuillez entourer le chiffre qui décrit le mieux votre niveau de connaissance actuel et le niveau de connaissance que vous souhaiteriez avoir :

*Veuillez encercler le chiffre qui décrit le mieux votre opinion sur une échelle de 0 à 5, où 0 correspond à un niveau de connaissance nul et 5 à un excellent niveau de connaissance.*

| Niveau de connaissance actuel |   |   |   |   |           | Thèmes                                                                                           | Niveau de connaissance souhaité |   |   |   |   |           |
|-------------------------------|---|---|---|---|-----------|--------------------------------------------------------------------------------------------------|---------------------------------|---|---|---|---|-----------|
| Nul                           | → |   |   |   | Excellent |                                                                                                  | Nul                             | → |   |   |   | Excellent |
| 0                             | 1 | 2 | 3 | 4 | 5         | Douleur chronique non cancéreuse et son traitement                                               | 0                               | 1 | 2 | 3 | 4 | 5         |
| 0                             | 1 | 2 | 3 | 4 | 5         | Mécanismes d'action des cannabinoïdes (système endocannabinoïde)                                 | 0                               | 1 | 2 | 3 | 4 | 5         |
| 0                             | 1 | 2 | 3 | 4 | 5         | Cannabinoïdes disponibles (molécules existantes)                                                 | 0                               | 1 | 2 | 3 | 4 | 5         |
| 0                             | 1 | 2 | 3 | 4 | 5         | Prescription efficace des cannabinoïdes (toutes indications confondues)                          | 0                               | 1 | 2 | 3 | 4 | 5         |
| 0                             | 1 | 2 | 3 | 4 | 5         | Prescription de cannabinoïdes pour la prise en charge de la douleur chronique non cancéreuse     | 0                               | 1 | 2 | 3 | 4 | 5         |
| 0                             | 1 | 2 | 3 | 4 | 5         | Risques de l'utilisation des cannabinoïdes à long terme                                          | 0                               | 1 | 2 | 3 | 4 | 5         |
| 0                             | 1 | 2 | 3 | 4 | 5         | Lois et réglementation entourant l'utilisation de marijuana à des fins médicales de Santé Canada | 0                               | 1 | 2 | 3 | 4 | 5         |
| 0                             | 1 | 2 | 3 | 4 | 5         | Synergie d'action entre les cannabinoïdes et les opioïdes                                        | 0                               | 1 | 2 | 3 | 4 | 5         |

### 6. Selon votre expérience, pour quel(s) syndrome(s) de douleur chronique non cancéreuse les cannabinoïdes peuvent-ils être efficaces? *(Cochez plusieurs cases, s'il y a lieu)*

- |                                                |                                                             |
|------------------------------------------------|-------------------------------------------------------------|
| <input type="checkbox"/> Arthrite rhumatoïde   | <input type="checkbox"/> Fibromyalgie                       |
| <input type="checkbox"/> Arthrose              | <input type="checkbox"/> Lombalgie                          |
| <input type="checkbox"/> Céphalées de tension  | <input type="checkbox"/> Migraines                          |
| <input type="checkbox"/> Cervicalgie           | <input type="checkbox"/> Syndrome du côlon irritable        |
| <input type="checkbox"/> Douleur neuropathique | <input type="checkbox"/> Autres (veuillez préciser) : _____ |

\_\_\_\_\_

\_\_\_\_\_

## Barrières face à l'utilisation de cannabinoïdes

### 7. Selon vous, est-ce que les facteurs suivants sont des barrières à l'utilisation des cannabinoïdes pour la prise en charge de la douleur chronique non cancéreuse dans la pratique médicale actuelle?

*Veillez encercler le chiffre qui décrit le mieux votre opinion sur une échelle de 0 à 5, où 0 n'est pas une barrière et 5 est une barrière importante.*

| Barrières potentielles                                                     | Votre opinion                                        |   |   |   |   |   |
|----------------------------------------------------------------------------|------------------------------------------------------|---|---|---|---|---|
|                                                                            | N'est pas une barrière → Est une barrière importante |   |   |   |   |   |
| Degré d'efficacité des cannabinoïdes                                       | 0                                                    | 1 | 2 | 3 | 4 | 5 |
| Risques/Effets indésirables                                                | 0                                                    | 1 | 2 | 3 | 4 | 5 |
| Données probantes limitées                                                 | 0                                                    | 1 | 2 | 3 | 4 | 5 |
| Fenêtre thérapeutique étroite                                              | 0                                                    | 1 | 2 | 3 | 4 | 5 |
| Interactions médicamenteuses                                               | 0                                                    | 1 | 2 | 3 | 4 | 5 |
| Suivi nécessaire/Monitorage                                                | 0                                                    | 1 | 2 | 3 | 4 | 5 |
| Manque de lignes directrices pour leur utilisation                         | 0                                                    | 1 | 2 | 3 | 4 | 5 |
| N'est pas un premier choix de traitement                                   | 0                                                    | 1 | 2 | 3 | 4 | 5 |
| Les patients ont tendance à sous-rapporter leurs symptômes douloureux      | 0                                                    | 1 | 2 | 3 | 4 | 5 |
| Stigma social associé aux cannabinoïdes (tabous et préjugés)               | 0                                                    | 1 | 2 | 3 | 4 | 5 |
| Craintes des patients/de leur famille                                      | 0                                                    | 1 | 2 | 3 | 4 | 5 |
| Manque de formation des professionnels de la santé                         | 0                                                    | 1 | 2 | 3 | 4 | 5 |
| Considérations légales                                                     | 0                                                    | 1 | 2 | 3 | 4 | 5 |
| Possibilité que le patient utilise les cannabinoïdes dans un but récréatif | 0                                                    | 1 | 2 | 3 | 4 | 5 |
| Possibilité de vente sur le marché noir                                    | 0                                                    | 1 | 2 | 3 | 4 | 5 |
| Autres barrières et commentaires :                                         |                                                      |   |   |   |   |   |
| <hr/>                                                                      |                                                      |   |   |   |   |   |
| <hr/>                                                                      |                                                      |   |   |   |   |   |

## Caractéristiques de la pratique médicale

8. Êtes-vous un homme ou une femme?

<sub>0</sub> Homme <sub>1</sub> Femme

9. Depuis combien d'années pratiquez-vous la médecine?

<sub>0</sub> 0-5 <sub>1</sub> 6-10 <sub>2</sub> 11-20 <sub>3</sub> 21+

10. Quelle est votre spécialité médicale?

<sub>0</sub> Médecin de famille/Omnipraticien <sub>1</sub> Autre spécialité médicale

11. Au cours de la dernière année, dans quel type de milieu de pratique avez-vous passé la majorité de votre temps?

- <sub>0</sub> Hôpital - Clinique externe
- <sub>1</sub> Hôpital - Salle d'urgence
- <sub>2</sub> Groupe de médecine de famille (GMF)
- <sub>3</sub> Cabinet médical privé
- <sub>4</sub> Milieux offrant des soins palliatifs
- <sub>5</sub> CLSC - Centre local de services communautaires
- <sub>6</sub> CHSLD - Centre d'hébergement et de soins de longue durée
- <sub>7</sub> Agence de la santé et des services sociaux de l'Abitibi-Témiscamingue (ASSSAT)
- <sub>8</sub> Autre (veuillez préciser) : \_\_\_\_\_

12. Au cours de la dernière année, quelle était la proportion de votre pratique médicale consacrée à voir des patients? *(Veuillez encercler la réponse)*

0 %    10    20    30    40    50    60    70    80    90    100 %

13. En moyenne, combien de patients rencontrez-vous par semaine dans le cadre de votre pratique médicale?

patients/semaine

Aucun, car je n'effectue pas le suivi de patients



1  
2  
3  
4  
5  
6  
7  
8  
9  
10  
11  
12  
13  
14  
15  
16  
17  
18  
19  
20  
21  
22  
23  
24  
25  
26  
27  
28  
29  
30  
31  
32  
33  
34  
35  
36  
37  
38  
39  
40  
41  
42  
43  
44  
45  
46  
47  
48  
49  
50  
51  
52  
53  
54  
55  
56  
57  
58  
59  
60

14. Selon vous, quelle est la prévalence (%) de douleur chronique non  
cancéreuse au sein de votre clientèle? *(Veuillez encrer la réponse)*

0 %    10    20    30    40    50    60    70    80    90    100 %

Non applicable, car je n'effectue pas le suivi de patients

15. Durant la dernière année, quelle proportion de vos activités de formation  
médicale continue portait sur la douleur chronique non cancéreuse et son  
traitement?

<sub>0</sub> 0 %    <sub>1</sub> 1-10 %    <sub>2</sub> 11-20 %    <sub>3</sub> 21-30 %    <sub>4</sub> 31-40 %    <sub>5</sub> >40 %

16. Durant la dernière année, quelle proportion de vos activités de formation  
médicale continue portait sur les cannabinoïdes?

<sub>0</sub> 0 %    <sub>1</sub> 1-10 %    <sub>2</sub> 11-20 %    <sub>3</sub> 21-30 %    <sub>4</sub> 31-40 %    <sub>5</sub> >40 %

Lorsque l'étude sera terminée, souhaitez-vous recevoir un résumé des  
résultats par courrier électronique?

Non

Oui : \_\_\_\_\_ @ \_\_\_\_\_

Le questionnaire se termine ici

**Veillez vous assurer d'avoir répondu à toutes les questions et nous  
retourner le questionnaire dans l'enveloppe-réponse au cours de la  
semaine prochaine afin d'éviter que nous vous relançons inutilement.**

**Merci beaucoup de votre participation!**
