# Supplementary material
Source: PubMed Central journal article supplement (PMC4565172)
Supplement: supp_3.2.E251_reporting_checklist_2014-0095.pdf [file supp_3.2.E251_reporting_checklist_2014-0095.pdf]

**STROBE Statement—checklist of items that should be included in reports of observational studies : CMAJOpen-2014-0095.R1**

|                              | <b>Item No</b> | <b>Recommendation</b>                                                                                                                                                                                                                                                                                                                                                                                                                                                  | <b>Page/section in paper</b>                                                     |
|------------------------------|----------------|------------------------------------------------------------------------------------------------------------------------------------------------------------------------------------------------------------------------------------------------------------------------------------------------------------------------------------------------------------------------------------------------------------------------------------------------------------------------|----------------------------------------------------------------------------------|
| <b>Title and abstract</b>    | 1              | (a) Indicate the study’s design with a commonly used term in the title or the abstract                                                                                                                                                                                                                                                                                                                                                                                 | p.1                                                                              |
|                              |                | (b) Provide in the abstract an informative and balanced summary of what was done and what was found                                                                                                                                                                                                                                                                                                                                                                    | p.2                                                                              |
| <b>Introduction</b>          |                |                                                                                                                                                                                                                                                                                                                                                                                                                                                                        |                                                                                  |
| Background/rationale         | 2              | Explain the scientific background and rationale for the investigation being reported                                                                                                                                                                                                                                                                                                                                                                                   | Three first paragraphs of the <i>Introduction</i> section (p.3-4)                |
| Objectives                   | 3              | State specific objectives, including any prespecified hypotheses                                                                                                                                                                                                                                                                                                                                                                                                       | Last paragraph of the <i>Introduction</i> section (p.4)                          |
| <b>Methods</b>               |                |                                                                                                                                                                                                                                                                                                                                                                                                                                                                        |                                                                                  |
| Study design                 | 4              | Present key elements of study design early in the paper                                                                                                                                                                                                                                                                                                                                                                                                                | <i>Study population</i> and <i>Research design &amp; protocol</i> sections (p.4) |
| Setting                      | 5              | Describe the setting, locations, and relevant dates, including periods of recruitment, exposure, follow-up, and data collection                                                                                                                                                                                                                                                                                                                                        | <i>Study population</i> section (p.4)                                            |
| Participants                 | 6              | (a) <i>Cohort study</i> —Give the eligibility criteria, and the sources and methods of selection of participants. Describe methods of follow-up<br><i>Case-control study</i> —Give the eligibility criteria, and the sources and methods of case ascertainment and control selection. Give the rationale for the choice of cases and controls<br><i>Cross-sectional study</i> —Give the eligibility criteria, and the sources and methods of selection of participants | <i>Study population</i> section (p.4)                                            |
|                              |                | (b) <i>Cohort study</i> —For matched studies, give matching criteria and number of exposed and unexposed<br><i>Case-control study</i> —For matched studies, give matching criteria and the number of controls per case                                                                                                                                                                                                                                                 | N/A                                                                              |
| Variables                    | 7              | Clearly define all outcomes, exposures, predictors, potential confounders, and effect modifiers. Give diagnostic criteria, if applicable                                                                                                                                                                                                                                                                                                                               | <i>Questionnaire development and measures</i> section (p.5-6)                    |
| Data sources/<br>measurement | 8*             | For each variable of interest, give sources of data and details of methods of assessment (measurement). Describe comparability of assessment methods if there is more than one group                                                                                                                                                                                                                                                                                   | <i>Questionnaire development and measures</i> section (p.5-6)                    |

|                        |     |                                                                                                                                                                                                                                                                                                           |                                                                                                                                      |
|------------------------|-----|-----------------------------------------------------------------------------------------------------------------------------------------------------------------------------------------------------------------------------------------------------------------------------------------------------------|--------------------------------------------------------------------------------------------------------------------------------------|
| Bias                   | 9   | Describe any efforts to address potential sources of bias                                                                                                                                                                                                                                                 | Efforts made to address selection bias, information bias and confounding are presented at pages 5-7                                  |
| Study size             | 10  | Explain how the study size was arrived at                                                                                                                                                                                                                                                                 | <i>Study population</i> section (p.4), <i>Data analysis</i> section (p. 7), and first paragraph of the <i>Results</i> section (p. 7) |
| Quantitative variables | 11  | Explain how quantitative variables were handled in the analyses. If applicable, describe which groupings were chosen and why                                                                                                                                                                              | <i>Data analysis</i> section (p. 6-7)                                                                                                |
| Statistical methods    | 12  | (a) Describe all statistical methods, including those used to control for confounding                                                                                                                                                                                                                     | <i>Data analysis</i> section (p. 6-7)                                                                                                |
|                        |     | (b) Describe any methods used to examine subgroups and interactions                                                                                                                                                                                                                                       | N/A                                                                                                                                  |
|                        |     | (c) Explain how missing data were addressed                                                                                                                                                                                                                                                               | Not handled because low proportion of missing data (See Table 3, Figure 1 and Figure 2 legends)                                      |
|                        |     | (d) <i>Cohort study</i> —If applicable, explain how loss to follow-up was addressed<br><i>Case-control study</i> —If applicable, explain how matching of cases and controls was addressed<br><i>Cross-sectional study</i> —If applicable, describe analytical methods taking account of sampling strategy | N/A                                                                                                                                  |
|                        |     | (e) Describe any sensitivity analyses                                                                                                                                                                                                                                                                     | N/A                                                                                                                                  |
| <b>Results</b>         |     |                                                                                                                                                                                                                                                                                                           |                                                                                                                                      |
| Participants           | 13* | (a) Report numbers of individuals at each stage of study—eg numbers potentially eligible, examined for eligibility, confirmed eligible, included in the study, completing follow-up, and analysed                                                                                                         | First paragraph of the <i>Results</i> section (p. 7), Table 1 and Table 2                                                            |
|                        |     | (b) Give reasons for non-participation at each stage                                                                                                                                                                                                                                                      | First paragraph of the <i>Results</i> section (p. 7)                                                                                 |
|                        |     | (c) Consider use of a flow diagram                                                                                                                                                                                                                                                                        | Table 1                                                                                                                              |
| Descriptive data       | 14* | (a) Give characteristics of study participants (eg demographic, clinical, social) and information on exposures and potential confounders                                                                                                                                                                  | Second paragraph of the <i>Results</i> section (p. 7) Table 3                                                                        |
|                        |     | (b) Indicate number of participants with missing data for each variable of interest                                                                                                                                                                                                                       | Table 3, Figure 1 and Figure 2 legends                                                                                               |
|                        |     | (c) <i>Cohort study</i> —Summarise follow-up time (eg, average and total amount)                                                                                                                                                                                                                          | N/A                                                                                                                                  |
| Outcome data           | 15* | <i>Cohort study</i> —Report numbers of outcome events or summary measures over time                                                                                                                                                                                                                       | N/A                                                                                                                                  |
|                        |     | <i>Case-control study</i> —Report numbers in each exposure category, or summary measures of exposure                                                                                                                                                                                                      | N/A                                                                                                                                  |

|                          |    |                                                                                                                                                                                                              |                                                             |
|--------------------------|----|--------------------------------------------------------------------------------------------------------------------------------------------------------------------------------------------------------------|-------------------------------------------------------------|
|                          |    | <i>Cross-sectional study</i> —Report numbers of outcome events or summary measures                                                                                                                           | <i>Results</i> section (p. 7-9)                             |
| Main results             | 16 | (a) Give unadjusted estimates and, if applicable, confounder-adjusted estimates and their precision (eg, 95% confidence interval). Make clear which confounders were adjusted for and why they were included | Table 4 and its legend                                      |
|                          |    | (b) Report category boundaries when continuous variables were categorized                                                                                                                                    | Table 4                                                     |
|                          |    | (c) If relevant, consider translating estimates of relative risk into absolute risk for a meaningful time period                                                                                             | N/A                                                         |
| Other analyses           | 17 | Report other analyses done—eg analyses of subgroups and interactions, and sensitivity analyses                                                                                                               | Second paragraph of page 8                                  |
| <b>Discussion</b>        |    |                                                                                                                                                                                                              |                                                             |
| Key results              | 18 | Summarise key results with reference to study objectives                                                                                                                                                     | First paragraph of the <i>Interpretation</i> section (9-10) |
| Limitations              | 19 | Discuss limitations of the study, taking into account sources of potential bias or imprecision. Discuss both direction and magnitude of any potential bias                                                   | <i>Limitations and Strengths</i> section (11-12)            |
| Interpretation           | 20 | Give a cautious overall interpretation of results considering objectives, limitations, multiplicity of analyses, results from similar studies, and other relevant evidence                                   | Pages 9-13                                                  |
| Generalisability         | 21 | Discuss the generalisability (external validity) of the study results                                                                                                                                        | <i>Limitations and Strengths</i> section (p. 12)            |
| <b>Other information</b> |    |                                                                                                                                                                                                              |                                                             |
| Funding                  | 22 | Give the source of funding and the role of the funders for the present study and, if applicable, for the original study on which the present article is based                                                | <i>Acknowledgements</i> section (p.14)                      |

\*Give information separately for cases and controls in case-control studies and, if applicable, for exposed and unexposed groups in cohort and cross-sectional studies.

**Note:** An Explanation and Elaboration article discusses each checklist item and gives methodological background and published examples of transparent reporting. The STROBE checklist is best used in conjunction with this article (freely available on the Web sites of PLoS Medicine at <http://www.plosmedicine.org/>, Annals of Internal Medicine at <http://www.annals.org/>, and Epidemiology at <http://www.epidem.com/>). Information on the STROBE Initiative is available at [www.strobe-statement.org](http://www.strobe-statement.org).
